# Supplementary material for: Pattern Triggered Immunity (PTI) in Tobacco: Isolation of Activated Genes Suggests Role of the Phenylpropanoid Pathway in Inhibition of Bacterial Pathogens
Source: PubMed Central journal article supplement (PMC4125134; doi:10.1371/journal.pone.0102869), 2014-08-07
Supplement: pone.0102869.s001.pdf [file pone.0102869.s001.pdf]

## Supporting Information S1. Contigs identified from tobacco PTI (Pattern Triggered Immunity).

Tobacco leaves were infiltrated with *Pseudomonas syringae* pv. *syringae* hrcC- bacteria. Samples were taken 6 and 48 hpi. Suppression Subtractive Hybridization was carried out to build a clone library of PTI-related transcripts. Sequencing and sequence assembly yielded 176 contigs described in the table below.

| Contig number          | Length (base-pairs) | Number of clones in contig | Genbank accession | Gene name                                                             | Blast "expect" value | Identity       |
|------------------------|---------------------|----------------------------|-------------------|-----------------------------------------------------------------------|----------------------|----------------|
| <b>CELL STRUCTURE</b>  |                     |                            |                   |                                                                       |                      |                |
| 13                     | 749                 | 3                          | AY422690          | N. attenuata tissue-type shoot beta-tubulin (TUB)                     | 0                    | 598/612 (97%)  |
| 156                    | 333                 | 1                          | AJ421413          | N. tabacum mRNA for alpha-tubulin (tubA3 gene)                        | 0                    | 325/325 (100%) |
| <b>CELL PROTECTION</b> |                     |                            |                   |                                                                       |                      |                |
| 8                      | 519                 | 9                          | X78203            | H.muticus mRNA for glutathione S-transferase                          | 7e-92                | 276/310 (89%)  |
| 52                     | 352                 | 2                          | U57350            | N. tabacum epoxide hydrolase                                          | e-179                | 344/352 (97%)  |
| 86                     | 495                 | 1                          | Y12013            | D. carota mRNA for RAD23 protein, isoform I                           | 1e-25                | 111/127 (87%)  |
| 98                     | 466                 | 1                          | AY383545          | A. thaliana NADK1 (At3g21070)                                         | 2,00E-14             | 77/88 (87%)    |
| 102                    | 348                 | 1                          | X55974            | N.plumbaginifolia mRNA for superoxide dismutase                       | e-123                | 307/331 (92%)  |
| 131                    | 228                 | 1                          | U57350            | N. tabacum epoxide hydrolase                                          | e-116                | 223/226 (98%)  |
| 155                    | 627                 | 1                          | DQ088821          | G. hirsutum FeSOD mRNA                                                | 2,00E-21             | 232/290 (80%)  |
| <b>CELLWALL</b>        |                     |                            |                   |                                                                       |                      |                |
| 2                      | 613                 | 26                         | AB041519          | N. tabacum mRNA for P-rich protein, NtEIG-C29                         | 0                    | 474/514 (92%)  |
| 3                      | 539                 | 13                         | Y19032            | N. tabacum cell wall protein (TLRP tyrosine- and lysine-rich protein) | e-170                | 366/396 (92%)  |
| 4                      | 284                 | 6                          | AF151215          | N. glauca cell-type guard cell glycine-rich protein                   | 2e-07                | 41/44 (93%)    |
| 5                      | 766                 | 16                         | AB035125          | N. tabacum NtEIG-E17 for glycine-rich protein                         | 0                    | 535/536 (99%)  |
| 21                     | 372                 | 4                          | X70343            | N.sylvestris mRNA for extensin                                        | e-176                | 350/370 (94%)  |
| 22                     | 144                 | 1                          | AJ271872          | N. sylvestris Ext1.2B gene for extensin                               | 9,00E-70             | 142/144 (98%)  |
| 31                     | 168                 | 4                          | D86721            | N. tabacum for glycine-rich protein                                   | 8,00E-89             | 168/168 (100%) |
| 42                     | 500                 | 2                          | AB041517          | N. tabacum NtEIG-A1 mRNA                                              | e-131                | 243/244 (99%)  |
| 44                     | 189                 | 3                          | AB041516          | N. tabacum mRNA for P-rich protein EIG-I30                            | e-100                | 188/188 (100%) |
| 74                     | 298                 | 1                          | AF291179          | C. annuum stellacyanin-like protein CASLP1 precursor                  | 6,00E-54             | 182/206 (88%)  |
| 75                     | 387                 | 1                          | AB041517          | N. tabacum NtEIG-A1                                                   | e-105                | 227/237 (95%)  |
| <b>DEFENCE-RELATED</b> |                     |                            |                   |                                                                       |                      |                |
| 6                      | 789                 | 16                         | AB044153          | N. tabacum mRNA for peroxidase                                        | 0                    | 761/783 (97%)  |
| 9                      | 454                 | 6                          | X83851            | N. tabacum mRNA for PAR-1b                                            | 0                    | 452/454 (99%)  |
| 10                     | 223                 | 3                          | AB041515          | N. tabacum NtEIG-E80 mRNA, complete cds                               | 1e-47                | 187/217 (86%)  |
| 11                     | 293                 | 8                          | M97360            | N. tabacum protein SAR8.2c                                            | e-160                | 288/288 (100%) |
| 19                     | 354                 | 5                          | AB267862.1        | N. tabacum NtChitIV gene for class IV chitinase                       | 3,00E-158            | 339/355 (95%)  |
| 26                     | 462                 | 4                          | AJ309300          | S. tuberosum putative membrane protein                                | e-121                | 355/399 (88%)  |
| 29                     | 176                 | 4                          | L02124            | N. tabacum anionic peroxidase gene                                    | 2,00E-92             | 174/174 (100%) |
| 71                     | 507                 | 2                          | Z11564            | N. tabacum mRNA for basic chitinase III                               | 0                    | 507/508 (99%)  |
| 72                     | 106                 | 2                          | AJ810538          | N. tabacum partial tpxN1 gene for peroxidase N1                       | 3e-51                | 105/106 (99%)  |
| 87                     | 225                 | 1                          | BT012770          | L. esculentum clone 113748F                                           | 6e-75                | 202/221 (91%)  |

|                            |     |    |            |                                                                                 |          |                |
|----------------------------|-----|----|------------|---------------------------------------------------------------------------------|----------|----------------|
| 99                         | 156 | 1  | AJ309384   | A. belladonna putative NtPRp27-like protein                                     | 5,00E-25 | 73/77 (94%)    |
| 109                        | 210 | 1  | AY562133   | N. tabacum TCIP mRNA                                                            | 5,00E-66 | 191/210 (90%)  |
| 118                        | 314 | 1  | X81834     | N. tabacum mRNA for beta-fructosidase                                           | e-171    | 312/314 (99%)  |
| 121                        | 241 | 1  | AY237117   | C. annuum leucine-rich repeat protein (LRR1)                                    | 2,00E-47 | 201/235 (85%)  |
| 134                        | 244 | 1  | X12737     | N. tabacum PR-1a pathogenesis-related protein                                   | e-134    | 244/244 (100%) |
| 140                        | 293 | 1  | AF154636   | N. tabacum clone PR5 sequence                                                   | e-143    | 262/263 (99%)  |
| <b>HEAT SHOCK PROTEINS</b> |     |    |            |                                                                                 |          |                |
| 14                         | 624 | 1  | Z71395     | N.plumbaginifolia calreticulin                                                  | 6,00E-59 | 125/127 (98%)  |
| 28                         | 917 | 4  | L08830     | L. esculentum BiP (binding protein)/grp78 (glucose-regulated protein, 78 kD)    | 0        | 791/914 (86%)  |
| 35                         | 337 | 3  | AJ538960   | N. tabacum cDNA-AFLP-fragment                                                   | 2,00E-14 | 62/68 (91%)    |
| 38                         | 247 | 3  | AY368274   | N. tabacum cyclophilin-like (CYP1) mRNA                                         | e-125    | 242/246 (98%)  |
| 47                         | 731 | 2  | X60058     | N. tabacum blp5 luminal binding protein (BiP)                                   | 0        | 721/723 (99%)  |
| 111                        | 396 | 1  | BT004527   | A. thaliana At4g24190 HSP90-like protein                                        | 2e-39    | 179/210 (85%)  |
| 133                        | 400 | 1  | L14594     | C. roseus heat shock protein 90                                                 | 5,00E-77 | 308/361 (85%)  |
| 145                        | 257 | 1  | Z71395     | N.plumbaginifolia calreticulin                                                  | 7,00E-72 | 146/148 (98%)  |
| 153                        | 77  | 1  | AY253832   | L. esculentum copper chaperone (LeCCH)                                          | 2,00E-13 | 53/57 (92%)    |
| <b>ENERGY, METABOLISM</b>  |     |    |            |                                                                                 |          |                |
| 12                         | 320 | 7  | AF082893   | S. tuberosum methionine synthase (MS)                                           | e-101    | 239/255 (93%)  |
| 18                         | 579 | 5  | AF127796   | C. chinense acyl carrier protein (Ac1)                                          | 6,00E-99 | 267/294 (90%)  |
| 20                         | 306 | 5  | AB061256   | S. tuberosum NADP-dependent malic enzyme                                        | e-116    | 275/295 (93%)  |
| 32                         | 154 | 4  | AF001270   | L. esculentum cytosolic NADP-malic enzyme 2                                     | 8,00E-61 | 145/153 (94%)  |
| 34                         | 479 | 3  | AF307144   | S. oleracea cytosolic 6-phosphogluconate dehydrogenase (pgdC)                   | 7,00E-24 | 204/252 (80%)  |
| 36                         | 408 | 3  | AF321140   | N. tabacum S-adenosylmethionine synthase                                        | 0        | 408/408 (100%) |
| 41                         | 144 | 3  | AF321140   | N. tabacum S-adenosylmethionine synthase                                        | 2,00E-73 | 142/142 (100%) |
| 46                         | 145 | 3  | X71441     | N. tabacum cytochrome b5                                                        | 2,00E-42 | 129/142 (90%)  |
| 60                         | 277 | 2  | X58108     | L. esculentum mRNA for enolase                                                  | e-112    | 259/277 (93%)  |
| 69                         | 107 | 2  | AF024634   | P. crispum NADPH cytochrome P450 reductase                                      | 7e-08    | 41/44 (93%)    |
| 77                         | 417 | 1  | AF082893   | S. tuberosum methionine synthase (MS)                                           | e-151    | 381/417 (91%)  |
| 80                         | 216 | 1  | D16138     | N. tabacum cytokinin binding protein CBP57 (S-adenosyl-L-homocystein hydrolase) | e-115    | 215/216 (99%)  |
| 92                         | 102 | 1  | D16139     | N. tabacum cytokinin binding protein CBP57                                      | 3,00E-47 | 101/102 (99%)  |
| 103                        | 413 | 1  | AY224189   | M. truncatula adenosylhomocysteinase (AHC2)                                     | 2,00E-57 | 260/308 (84%)  |
| 105                        | 496 | 1  | BT020249   | A. thaliana At2g30720 thioesterase family protein                               | 4,00E-19 | 79/88 (89%)    |
| 115                        | 333 | 1  | X82325     | S. tuberosum cytochrome c reductase                                             | 7e-11    | 131/162 (80%)  |
| 122                        | 492 | 1  | AF001270   | L. esculentum cytosolic NADP-malic enzyme                                       | e-164    | 443/492 (90%)  |
| 126                        | 286 | 1  | AB007907   | G. max 6-phosphogluconate dehydrogenase                                         | 3,00E-31 | 135/156 (86%)  |
| 162                        | 261 | 1  | AY695053   | N. tabacum adenosine kinase isoform 2S                                          | e-144    | 261/261 (100%) |
| 170                        | 175 | 1  | AF001270   | L. esculentum cytosolic NADP-malic enzyme                                       | 1,00E-63 | 159/170 (93%)  |
| 174                        | 188 | 1  | AF082893   | S. tuberosum methionine synthase (MS)                                           | 9,00E-12 | 63/71 (88%)    |
| <b>MISCELLANEOUS</b>       |     |    |            |                                                                                 |          |                |
| 7                          | 195 | 10 | AB206920.1 | C. annuum catf2 gene for acyl-transferase                                       | 7e-14    | 69/78 (88%)    |
| 17                         | 292 | 6  | BT014186   | L. esculentum clone 133363F                                                     | 5,00E-42 | 141/158 (89%)  |
| 30                         | 949 | 4  | AY819026   | C. frutescens acyltransferase (Pun1)                                            | 7,00E-91 | 301/346 (86%)  |
| 63                         | 211 | 2  | D26460     | N. glauca X N. langsdorffii tumor-related protein                               | 1e-11    | 39/39 (100%)   |
| 91                         | 333 | 1  | BT009240   | T. aestivum clone wlk1.pk0007.f5:fis                                            | 2e-14    | 128/156 (82%)  |
| 132                        | 480 | 1  | AF243180   | L. esculentum dicyanin                                                          | 8,00E-64 | 249/289 (86%)  |
| 147                        | 218 | 1  | D26106     | C. sativus ferredoxin-like protein                                              | 1,00E-11 | 105/127 (82%)  |
| <b>PHENYLPROPANOID</b>     |     |    |            |                                                                                 |          |                |
| 1                          | 449 | 39 | X74453     | N. tabacum OMT I-b mRNA                                                         | 0        | 438/447 (97%)  |

|     |     |   |          |                                                              |          |                |
|-----|-----|---|----------|--------------------------------------------------------------|----------|----------------|
| 39  | 654 | 3 | AF150881 | L. esculentum x L. peruvianum ferulate-5-hydroxylase (CYP84) | 4,00E-23 | 167/203 (82%)  |
| 45  | 172 | 3 | AF212318 | C. annuum cinnamic acid 4-hydroxylase (C4H)                  | 3e-14    | 103/123 (83%)  |
| 51  | 468 | 2 | U50845   | N. tabacum 4-coumarate:Co-A ligase (4CL)                     | 0        | 466/468 (99%)  |
| 64  | 209 | 2 | D17467   | N. tabacum phenylalanine ammonia-lyase                       | e-111    | 208/209 (99%)  |
| 84  | 652 | 1 | X78269   | N. tabacum phenylalanine ammonia-lyase                       | 0        | 650/652 (99%)  |
| 136 | 137 | 1 | X74452   | N. tabacum OMT I-a mRNA                                      | 5,00E-68 | 136/137 (99%)  |
| 165 | 649 | 1 | Z21796   | L. esculentum chorismate synthase 1 precursor                | 0        | 458/494 (92%), |
| 175 | 498 | 1 | X71430   | N. tabacum O-diphenol-O-methyltransferase.                   | 0        | 497/498 (99%)  |

#### PHOTOSYNTHESIS

|     |     |   |          |                                                                                 |       |               |
|-----|-----|---|----------|---------------------------------------------------------------------------------|-------|---------------|
| 104 | 219 | 1 | X17578   | S. tuberosum 33kDa precursor protein of the oxygen-evolving complex             | 5e-32 | 145/167 (86%) |
| 169 | 329 | 1 | AB012636 | N. sylvestris Lhcb1*1 gene for light harvesting chlorophyll a/b-binding protein | e-153 | 316/329 (96%) |

#### PROTEIN METABOLISM

|     |     |   |          |                                                                     |          |               |
|-----|-----|---|----------|---------------------------------------------------------------------|----------|---------------|
| 25  | 484 | 1 | AB177386 | D. caryophyllus DC-CP2 cysteine proteinase                          | 4,00E-04 | 60/71 (84%)   |
| 56  | 270 | 2 | DQ016993 | I. batatas putative L24 ribosomal protein                           | 6e-57    | 212/245 (86%) |
| 62  | 219 | 2 | BT014015 | L. esculentum clone 133077F ribosomal protein                       | 5,00E-23 | 86/94 (91%)   |
| 65  | 195 | 2 | AY504966 | I. hollandica putative cysteine protease 1(CYS1)                    | 0,002    | 37/41 (90%)   |
| 97  | 248 | 1 | AF332451 | A. thaliana putative E2, ubiquitin-conjugating enzyme 1 (At1g14400) | 3,00E-34 | 131/149 (87%) |
| 112 | 258 | 1 | Z31720   | N. tabacum L19 ribosomal protein L19                                | 2e-78    | 223/247 (90%) |
| 120 | 90  | 1 | Y09505   | N. tabacum mRNA for delta proteasome subunit                        | 5,00E-33 | 86/90 (95%)   |
| 127 | 140 | 1 | AF370549 | A. thaliana Putative ribosomal protein (F5A13.4)                    | 0,006    |               |
| 159 | 279 | 1 | AY662988 | P. hybrida cysteine proteinase (CP2)                                | 2,00E-72 | 204/225 (90%) |
| 161 | 163 | 1 | AJ844617 | P. major mRNA for polyubiquitin (ubq3 gene).                        | 1,00E-41 | 143/161 (88%) |
| 163 | 414 | 1 | AK121755 | O. sativa (japonica cultivar-group) cDNA                            | 4,00E-22 | 69/73 (94%)   |
| 167 | 387 | 1 | AY133535 | A. thaliana At5g60160/f15112_20                                     | 3,00E-19 | 175/216 (81%) |
| 171 | 429 | 1 | AJ223329 | N. tabacum TUQG3 gene, complete CDS.                                | 0        | 410/429 (95%) |

#### SIGNALLING

|     |     |   |          |                                                                                            |          |                |
|-----|-----|---|----------|--------------------------------------------------------------------------------------------|----------|----------------|
| 24  | 409 | 3 | AB117525 | N. tabacum NtMKP1 mRNA for MAP kinase                                                      | 0        | 335/335 (100%) |
| 53  | 375 | 2 | AY904339 | C. annuum calcium-dependent protein kinase 4 (CDPK4)                                       | 1e-15    | 73/82 (89%)    |
| 54  | 332 | 2 | Z29529   | N. tabacum ethylene forming enzyme (EFE).                                                  | 0        | 331/332 (99%)  |
| 55  | 292 | 2 | U91723   | N. tabacum 14-3-3 isoform b T14-3b                                                         | e-162    | 292/292 (100%) |
| 58  | 253 | 2 | AK221707 | A. thaliana MAP3K-like protein kinase                                                      | 1,00E-17 | 91/105 (86%)   |
| 59  | 271 | 2 | D26015   | N. tabacum CND41, chloroplast nucleoid DNA binding protein with aspartic protease activity | e-136    | 262/269 (97%)  |
| 66  | 169 | 2 | L29275   | N. tabacum SR1 Nt-rab7b                                                                    | 1e-87    | 166/166 (100%) |
| 90  | 140 | 1 | AB073628 | N. tabacum mRNA for receptor-like protein kinase                                           | 3e-72    | 140/140 (100%) |
| 94  | 280 | 1 | AY673975 | S. tuberosum phosphatidylinositol synthase                                                 | e-113    | 260/277 (93%)  |
| 95  | 190 | 1 | AF211529 | N. tabacum Avr9/Cf-9 rapidly elicited protein 31 (ACRE31)                                  | e-102    | 190/190 (100%) |
| 106 | 451 | 1 | AJ276267 | C. arietinum mRNA for putative PTS protein                                                 | 1e-22    | 205/254 (80%)  |
| 108 | 387 | 1 | Z29529   | N. tabacum ethylene forming enzyme (EFE)                                                   | 0        | 386/387 (99%)  |
| 124 | 125 | 1 | U91723   | N. tabacum 14-3-3 isoform b T14-3b                                                         | 3,00E-63 | 125/125 (100%) |
| 125 | 637 | 1 | Y11348   | M.sativa annexin-like protein                                                              | 8e-09    | 107/131 (81%)  |
| 135 | 354 | 1 | AF478458 | C. annuum DNA binding protein Rav                                                          | 7,00E-82 | 271/309 (87%)  |
| 137 | 129 | 1 | AB073628 | N. tabacum mRNA for receptor-like protein kinase                                           | 3,00E-35 | 115/126 (91%)  |
| 139 | 375 | 1 | AY972084 | O. sativa sphingosine-1-phosphate lyase (SPL)                                              | 2,00E-17 | 70/77 (90%)    |
| 142 | 361 | 1 | AY227667 | L. esculentum myo inositol monophosphatase isoform 2 (IMP-2)                               | 1,00E-21 | 89/100 (89%)   |
| 144 | 450 | 1 | U94748   | P. hybrida WD repeat protein AN11 (An11)                                                   | e-140    | 399/447 (89%)  |

|                                  |     |   |            |                                                                      |          |                |
|----------------------------------|-----|---|------------|----------------------------------------------------------------------|----------|----------------|
| 151                              | 236 | 1 | AB014483   | N. tabacum NtHSF1 heat shock factor,                                 | e-124    | 234/236 (99%)  |
| <b>TERPENOIDS</b>                |     |   |            |                                                                      |          |                |
| 73                               | 231 | 2 | AF542544   | N. attenuata 5-epi-aristolochene synthase                            | e-104    | 207/226 (91%)  |
| 130                              | 116 | 1 | AF004233   | N. tabacum hydroxy-methyl-glutaryl-coenzyme A reductase (HMGR1)      | 9,00E-54 | 116/117 (99%)  |
| 164                              | 185 | 1 | AY497303   | N. benthamiana (E)-4-hydroxy-3-methylbut-2-enyl diphosphate synthase | 4,00E-94 | 183/185 (98%)  |
| 173                              | 460 | 1 | BT013122.  | L. esculentum mevalonate diphosphate decarboxylase                   | 0        | 430/460 (93%)  |
| <b>TRANSPORT</b>                 |     |   |            |                                                                      |          |                |
| 15                               | 604 | 1 | BT013651   | L. esculentum putative ABC transporter                               | e-145    | 330/352 (93%)  |
| 16                               | 409 | 1 | AF347614   | L. esculentum sulfate transporter 2 mRNA                             | e-131    | 362/403 (89%)  |
| 23                               | 407 | 4 | BT013251   | L. esculentum putative ABC transporter                               | e-116    | 359/407 (88%)  |
| 57                               | 266 | 2 | AF290618   | N. glauca putative delta TIP (MIP2)                                  | 3e-49    | 117/122 (95%)  |
| 67                               | 156 | 2 | X66856     | N. tabacum MST1 mRNA                                                 | 1e-81    | 156/156 (100%) |
| 89                               | 714 | 1 | BT014249   | L. esculentum clone putative coatmer protein                         | e-175    | 533/606 (87%)  |
| 101                              | 503 | 1 | AY220478   | N. tabacum Avr9/Cf-9 rapidly elicited protein 141 (ACRE141)          | e-172    | 454/503 (90%)  |
| 107                              | 142 | 1 | AB075550   | N. tabacum NtPDR1 mRNA for pleiotropic drug resistance like protein  | 5e-71    | 141/142 (99%)  |
| 138                              | 119 | 1 | X62123     | S. tuberosum ant gene for ADP/ATP translocator                       | 8,00E-48 | 114/119 (95%)  |
| 143                              | 318 | 1 | AJ563367   | G. max sorbitol-like transporter (stp gene).                         | 6,00E-11 | 98/118 (83%)   |
| 154                              | 144 | 1 | AY302065.  | P. tomentosa ADP-ribosylation factor 1                               | 2,00E-55 | 136/144 (94%)  |
| 172                              | 397 | 1 | U64823     | N. sylvestris amino acid permease (nsaap1)                           | 1,00E-74 | 235/265 (88%)  |
| <b>UNKNOWN</b>                   |     |   |            |                                                                      |          |                |
| 27                               | 310 | 4 | BT014512   | L. esculentum clone                                                  | 1,00E-30 | 197/239 (82%)  |
| 40                               | 251 | 3 | AJ00321    | S. tuberosum mRNA for hypothetical protein                           | 1,00E-30 | 200/243 (82%)  |
| 68                               | 245 | 2 | AY087786   | A. thaliana clone 38412 mRNA                                         | 2e-07    | 59/68 (86%)    |
| 79                               | 469 | 1 | AC158209   | M. truncatula clone mth2-154h5                                       | 1e-09    | 81/96 (84%)    |
| 83                               | 440 | 1 | AJ718559   | N. tabacum cDNA-AFLP-fragment BSTC2-32-400                           | e-178    | 334/339 (98%)  |
| 88                               | 573 | 1 | AP004525   | L. corniculatus var. japonicus genomic DNA                           | 0,007    | 46/53 (86%)    |
| 100                              | 392 | 1 | BT013096   | L. esculentum clone 114362R                                          | e-174    | 372/392 (94%)  |
| 114                              | 128 | 1 | BT014442   | L. esculentum clone 133764F                                          | 8e-39    | 117/128 (91%)  |
| 148                              | 485 | 1 | AP008211   | O. sativa genomic DNA, chromosome 5.                                 | 2,00E-08 | 55/62 (88%)    |
| 150                              | 362 | 1 | AL161595.2 | A. thaliana DNA chromosome 4, con. fragment 91.                      | 1        | 36/41 (87%)    |
| 166                              | 341 | 1 | AC155101.  | M. truncatula clone mth2-139j13                                      | 3,00E-07 | 86/104 (82%)   |
| <b>NO SIGNIFICANT SIMILARITY</b> |     |   |            |                                                                      |          |                |
| 33                               | 39  | 4 | NA         |                                                                      |          |                |
| 37                               | 255 | 3 | NA         |                                                                      |          |                |
| 43                               | 255 | 1 | NA         |                                                                      |          |                |
| 48                               | 598 | 2 | NA         |                                                                      |          |                |
| 49                               | 550 | 2 | NA         |                                                                      |          |                |
| 50                               | 499 | 2 | NA         |                                                                      |          |                |
| 61                               | 220 | 2 | NA         |                                                                      |          |                |
| 70                               | 173 | 2 | NA         |                                                                      |          |                |
| 76                               | 30  | 2 | NA         |                                                                      |          |                |
| 78                               | 145 | 1 | NA         |                                                                      |          |                |
| 81                               | 378 | 1 | NA         |                                                                      |          |                |
| 82                               | 368 | 1 | NA         |                                                                      |          |                |
| 85                               | 115 | 1 | NA         |                                                                      |          |                |
| 93                               | 248 | 1 | NA         |                                                                      |          |                |

|     |     |   |    |
|-----|-----|---|----|
| 96  | 275 | 1 | NA |
| 110 | 167 | 1 | NA |
| 113 | 451 | 1 | NA |
| 116 | 185 | 1 | NA |
| 117 | 633 | 1 | NA |
| 119 | 80  | 1 | NA |
| 123 | 297 | 1 | NA |
| 128 | 346 | 1 | NA |
| 129 | 399 | 1 | NA |
| 141 | 169 | 1 | NA |
| 146 | 30  | 1 | NA |
| 149 | 300 | 1 | NA |
| 152 | 271 | 1 | NA |
| 157 | 128 | 1 | NA |
| 158 | 171 | 1 | NA |
| 160 | 177 | 1 | NA |
| 168 | 267 | 1 | NA |
| 176 | 9   | 1 | NA |
