# Supplementary material for: Pattern Triggered Immunity (PTI) in Tobacco: Isolation of Activated Genes Suggests Role of the Phenylpropanoid Pathway in Inhibition of Bacterial Pathogens
Source: PubMed Central journal article supplement (PMC4125134; doi:10.1371/journal.pone.0102869), 2014-08-07
Supplement: pone.0102869.s003.pdf [file pone.0102869.s003.pdf]

**Supporting Information S3. Verification of gene-activation by real-time RT-PCR: data corresponding to Fig. 3.**

Ratios of mRNA levels are compared to water-treated controls. Tobacco leaves were infiltrated with *P. syringae* pv. *syringae* hrcC- suspension or flagellin22 peptide, samples were taken 3, 6 and 48 hours later. Flagellin-treated leaves were sampled earlier, because of earlier timing of gene activation. Values are averages of three independent biological replicates. Each replicate was normalized by corresponding actin levels. Stars indicate significant gene activation ( $p < 0.05$ ) as compared to water treated controls.

| functional group                          | contig number                | gene name                                         | treatment | 3 hpi   |      | 6 hpi   |       | 48 hpi  |       |
|-------------------------------------------|------------------------------|---------------------------------------------------|-----------|---------|------|---------|-------|---------|-------|
|                                           |                              |                                                   |           | fold    | sd   | fold    | sd    | fold    | sd    |
| Signal transduction-related genes         | C171                         | UBIE (ubiquitin extension protein)                | PS hrcC   | -       | -    | 1,30    | 0,48  | 1,44    | 0,51  |
|                                           | C139                         | sphingosine-1-phosphate lyase (SPL)               |           | -       | -    | 0,61    | 0,11  | 1,04    | 0,08  |
|                                           | C66                          | SR1 Nt-rab7b membrane-associated GTP-binding      |           | -       | -    | 0,89    | 0,20  | 1,31    | 0,18  |
|                                           | C59                          | CND41, chloroplast nucleoid DNA binding protein   |           | -       | -    | 1,07    | 0,20  | 5,56    | 5,30  |
|                                           | C94                          | phosphatidylinositol synthase                     |           | -       | -    | 1,33    | 0,16  | 1,41    | 0,35  |
|                                           | C106                         | putative PTS HPR protein (serine-phosphorylation) |           | -       | -    | 1,45    | 0,66  | 3,72 *  | 1,54  |
|                                           | C24                          | NtMKP1 MAP kinase                                 |           | -       | -    | 1,53    | 0,39  | 2,89 *  | 0,65  |
|                                           | C90                          | receptor-like protein kinase                      |           | -       | -    | 1,61    | 0,47  | 2,28 *  | 0,65  |
|                                           | C108                         | ethylene forming enzyme (EFE)                     |           | -       | -    | 2,06    | 1,19  | 2,77 *  | 1,28  |
|                                           | C125                         | annexin-like protein                              |           | -       | -    | 2,25    | 0,53  | 5,40 *  | 2,44  |
|                                           | C144                         | WD repeat protein AN11 (An11)                     |           | -       | -    | 2,97 *  | 1,22  | 1,88    | 1,07  |
|                                           | C55                          | 14-3-3 protein isoform b T14-3b                   |           | -       | -    | 3,04    | 2,59  | 1,54    | 0,60  |
|                                           | C135                         | DNA binding protein Rav                           |           | -       | -    | 3,58 *  | 1,05  | 3,25 *  | 0,81  |
|                                           | C53                          | calcium-dependent protein kinase 4 (CDPK4)        |           | -       | -    | 3,85 *  | 0,85  | 2,74    | 1,23  |
|                                           | C58                          | MAP3K-like protein kinase                         |           | -       | -    | 4,12 *  | 1,76  | 1,76    | 0,58  |
|                                           | C151                         | NtHSF1 heat shock factor,                         |           | -       | -    | 7,03 *  | 3,21  | 2,64 *  | 1,87  |
|                                           | C95                          | Avr9/Cf-9 rapidly elicited protein 31 (ACRE31)    |           | -       | -    | 9,28 *  | 5,37  | 8,83 *  | 6,94  |
| Phenylpropanoid pathway and lignification | C171                         | UBIE (ubiquitin extension protein)                | flg22     | -       | -    | 1,30    | 0,48  | 1,44    | 0,51  |
|                                           | C51                          | 4CL (4-hydroxycinnamoyl-CoA ligase)               |           | -       | -    | 5,84 *  | 1,94  | 5,65 *  | 2,45  |
|                                           | C45                          | C4H (cinnamate 4-hydroxylase)                     |           | -       | -    | 6,63 *  | 2,60  | 3,91 *  | 2,27  |
|                                           | C84                          | PALb ( Phenylalanine ammonia-lyase)               |           | -       | -    | 7,59 *  | 3,80  | 8,74 *  | 3,28  |
|                                           | C64                          | PALa ( Phenylalanine ammonia-lyase)               |           | -       | -    | 8,27 *  | 5,73  | 9,45 *  | 4,12  |
|                                           | C72                          | POX (peroxidase)                                  |           | -       | -    | 12,47 * | 4,68  | 8,60 *  | 4,56  |
|                                           | C1                           | OMT I (O-methyltransferase)                       |           | -       | -    | 14,40 * | 8,81  | 3,38 *  | 1,93  |
|                                           | C39                          | F5H (ferulate 5-hydroxylase)                      |           | -       | -    | 97,97 * | 59,54 | 21,34 * | 13,89 |
|                                           | C51                          | 4CL (4-hydroxycinnamoyl-CoA ligase)               |           | 3,49 *  | 0,22 | 1,09    | 0,18  | -       | -     |
|                                           | C45                          | C4H (cinnamate 4-hydroxylase)                     |           | 3,86 *  | 0,21 | 0,71    | 0,36  | -       | -     |
|                                           | C84                          | PALb (Phenylalanine ammonia-lyase)                |           | 2,68 *  | 0,10 | 1,40    | 0,84  | -       | -     |
|                                           | C64                          | PALa ( Phenylalanine ammonia-lyase)               |           | 5,44 *  | 0,47 | 2,00    | 0,41  | -       | -     |
|                                           | C72                          | POX (peroxidase)                                  |           | 4,72 *  | 0,49 | 6,94 *  | 0,50  | -       | -     |
| C1                                        | OMT I (O-methyltransferase)  | 3,58 *                                            | 0,01      | 3,57    | 1,85 | -       | -     |         |       |
| C39                                       | F5H (ferulate 5-hydroxylase) | 18,04 *                                           | 0,87      | 17,93 * | 1,33 | -       | -     |         |       |

\*  $p < 0.05$

PS hrcC: *Pseudomonas syringae* pv. *syringae* hrcC-

flg22: flagellin 22 peptide
