# Supplementary material for: Pattern Triggered Immunity (PTI) in Tobacco: Isolation of Activated Genes Suggests Role of the Phenylpropanoid Pathway in Inhibition of Bacterial Pathogens
Source: PubMed Central journal article supplement (PMC4125134; doi:10.1371/journal.pone.0102869), 2014-08-07
Supplement: pone.0102869.s005.pdf [file pone.0102869.s005.pdf]

---

**Supporting Information S5. Primer sequences used for tobacco real-time RT-PCR in this work.**

The primers in the list were designed for *Nicotiana tabacum* cv. *Samsun* derived gene fragments to assess expressional activation of the genes during PTI. The primers anneal optimally at 60°C and result in a PCR product of 50-150 basepairs. Therefore these primers can be run in parallel PCR reactions among the same conditions, without further optimization.

---

| <b>Contig/clone number</b> | <b>Forward primer</b>           | <b>Reverse primer</b>             |
|----------------------------|---------------------------------|-----------------------------------|
| actin                      | CGGAATCCACGAGACTACATAC          | GGGAAGCCAAGATAGAGC                |
| C7/EBR-15                  | CGT GTT GGG TTC TCT ACT CCT     | GGC TGC CAA ATT GGA TGC TCT       |
| C45/EBR-38A                | TAAAACGCTTTGAACGAAGTCTA         | TTAATTGGTCTCTTCTTTGCCAT           |
| C131/EBR-38B               | CAGATGATAGCAGTAGCGGAT           | TGAATGTCGTCTTCTCGGGTT             |
| C1/EBR-43                  | ATGATTGGAGCGACGAGCATT           | GCCTCTGGAAGTATGCACTC              |
| C5/EBR-44                  | TGGCTCTTGTCATCATAATCC           | CCGAACCACCTCCGTTGC                |
| C70/EBR-47                 | TCT TCC TTC CTC ACA TAC ATC T   | ATT TTC CAA AGA CGC TTG TGG T     |
| C154/EBR-51                | GAA TGA GGA TGA ACT GAG GGA T   | ATC TCA GCA GCA TTC ATA GCA T     |
| C8/EBR-52                  | GGATGGAAGTAGAATCAACAAA          | TTTCTTCATTCTCTGTAACTGC            |
| C10/EBR-54                 | AGC AGA GCT TAG AGG TAA ACT     | GCA AGA CAT CAG AGG TTA TCG T     |
| C21/EBR-59                 | GATATACAACCTAACGTGAAGTCAATG     | TAGGAAATGCGTTCTACTACTCTA          |
| C177/EBR-61                | TCG TAG CCG TTG CCG TTG 3       | CGA GAG CCA ATC CGA AGG TA        |
| C149/EBR-437               | AAC GCT GAA GTA ACC CGT CAT T   | GGC AAA ATC AGG AGG AGC ATA TC    |
| C11/EBR-445                | TTT CGT ATC CAA CCC GGT ATC T   | GGC GGC TGC TCC AAT TAC           |
| C3/EBR-627                 | ATA AAC GTA GAG GAT GCC GCT AT  | CAC CTG CGT AGG AAC AAC AC        |
| C134/EBR-635               | GTC CCA GGT CAA AGG TTC TAC A   | TTG CCT TCA TTT CTT CTT GTC TCT A |
| C24                        | AGCAGCTTGTTTGCTCTTCCTCAG        | TGTGAGCATCCCAGGCAGTGAAAAG         |
| C53                        | GATTGGAGAAAAGGCATCACGAC         | TTTTAAGGATCCATCGCTCATCA           |
| C108                       | GGA CGC TGG TGG CAT AAT C       | CCT CAA GTT GAT CGC CAA GGT       |
| C55                        | CCG AGC AAG CCG AGA GAT AT      | GCC ACG GAG AGG AGA TTT CT        |
| C58                        | TTTTCTGACAATCCCAACATAACAGC      | GCTCCACCACCATCACTTTTCTG           |
| C59                        | GACCTCACTTGGACTCAATGCCAAC       | GACTAGAACAAGCAGCGGAAGTGC          |
| C66                        | CGA GGG CTA AAG GAA TCC A       | GGT GTT GGC ACT AGC AGT CA        |
| C90                        | AATTACAACAAAACTTAACCTGCACAGGCTC | AATGTGTTCTGTATTTTCAGTTGTTACCATCTC |
| C94                        | TTT GAT GAA TTG CGT TGC GT      | GAT TGA ATT TTC GGG CAA ACC       |
| C95                        | ATG CGT TTA ACG TGT TCG ATG     | CCT GTA ATT CCT TCG CCG ATA       |
| C106                       | GCT GGT GAT GTA AAG GCC GTA T   | CCA AAG CCT CCA GCA TAG CA        |
| C125                       | ATG CAA GGA CAA TGC GCT ATG     | GCC TTC TCA TCG GTT CCC AAT       |
| C135                       | AGTCAACAAAGCGCGTGAACAG          | TTTCCAACATCACTTGGTGTAACAGC        |
| C139                       | GGC CTT CCA ATC ACG AAC AGT     | GCG TGG GCA GCA ATG ATA T         |
| C144                       | TGTGGCGGAGTTAGAAAGGCATCAG       | CAATCCCATTAGGCCAGCAACAG           |
| C151                       | CGGCTTTCCGACGGCGTATTG           | CCAGCTTCGTTTCGTCAGCTTAACAC        |
| C39                        | AGCTGAATCTTGGGACTCAGTTCGTG      | ACTTAAACCAGTGCTAGTGGCAACAAC       |
| C51                        | CGAGGCCACAACGAGAACAATAGA        | TGATCAATTCCTTCAATCGATCCA          |
| C64                        | AGCAACACAACCAAGATGTGAACTC       | GCTTTAAGATGTCCACGGCTTCAG          |
| C84                        | GACAAATGAGGCTGCTGCTATTATG       | TGATGTTCTGAGGGCGTAACGAT           |
| C171                       | CCA AGC CCA AAA AGA TCA AGC     | AGC ACC ACA CTC AGC GTT AGG       |

---
